# Supplementary material
Source: Springer Nature journal article supplement (https://www.springermedizin.de/resource/supplementary/13000_2013_774_MOESM4_ESM.pdf/9625438)

DFS(Lymph Node Positive)

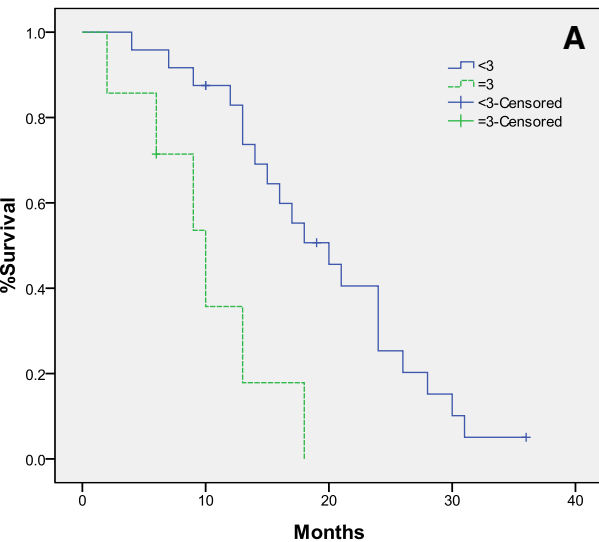

DFS(Lymph Node Negative)

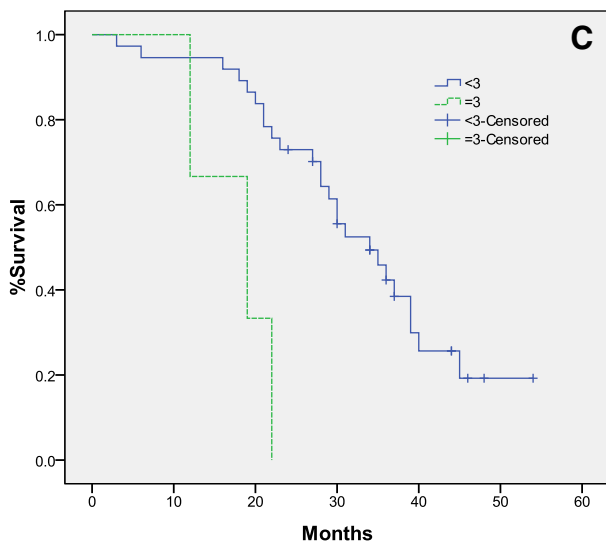

OS(Lymph Node Positive)

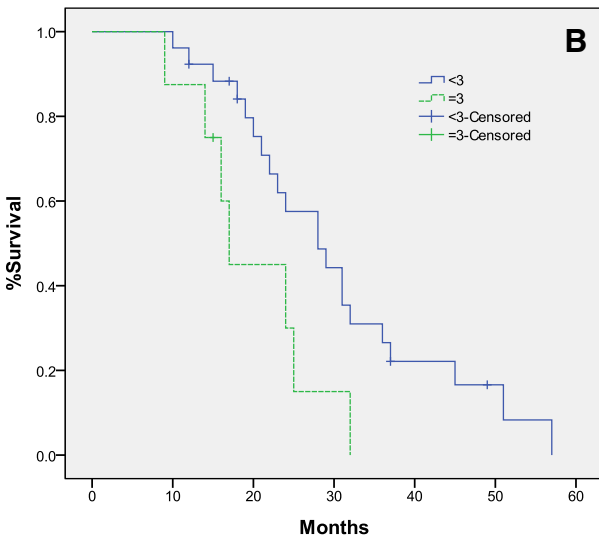

OS(Lymph Node Negative)

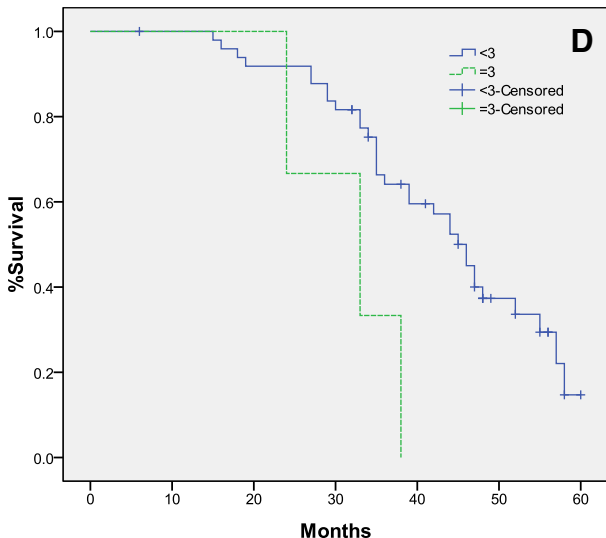

Supplement: MOESM4 [file 9625438]
